# Supplementary material
Source: PubMed Central journal article supplement (PMC5986979)
Supplement: mmc1.pdf [file mmc1.pdf]

YMTHE, Volume 26

## **Supplemental Information**

**HIV-Specific T Cells Generated from Naive T**

**Cells Suppress HIV *In Vitro* and Recognize**

**Wide Epitope Breadths**

**Shabnum Patel, Elizabeth Chorvinsky, Shuroug Albiyani, Conrad Russell Cruz, R. Brad Jones, Elizabeth J. Shpall, David M. Margolis, Richard F. Ambinder, and Catherine M. Bollard**

Supplemental Figure 1

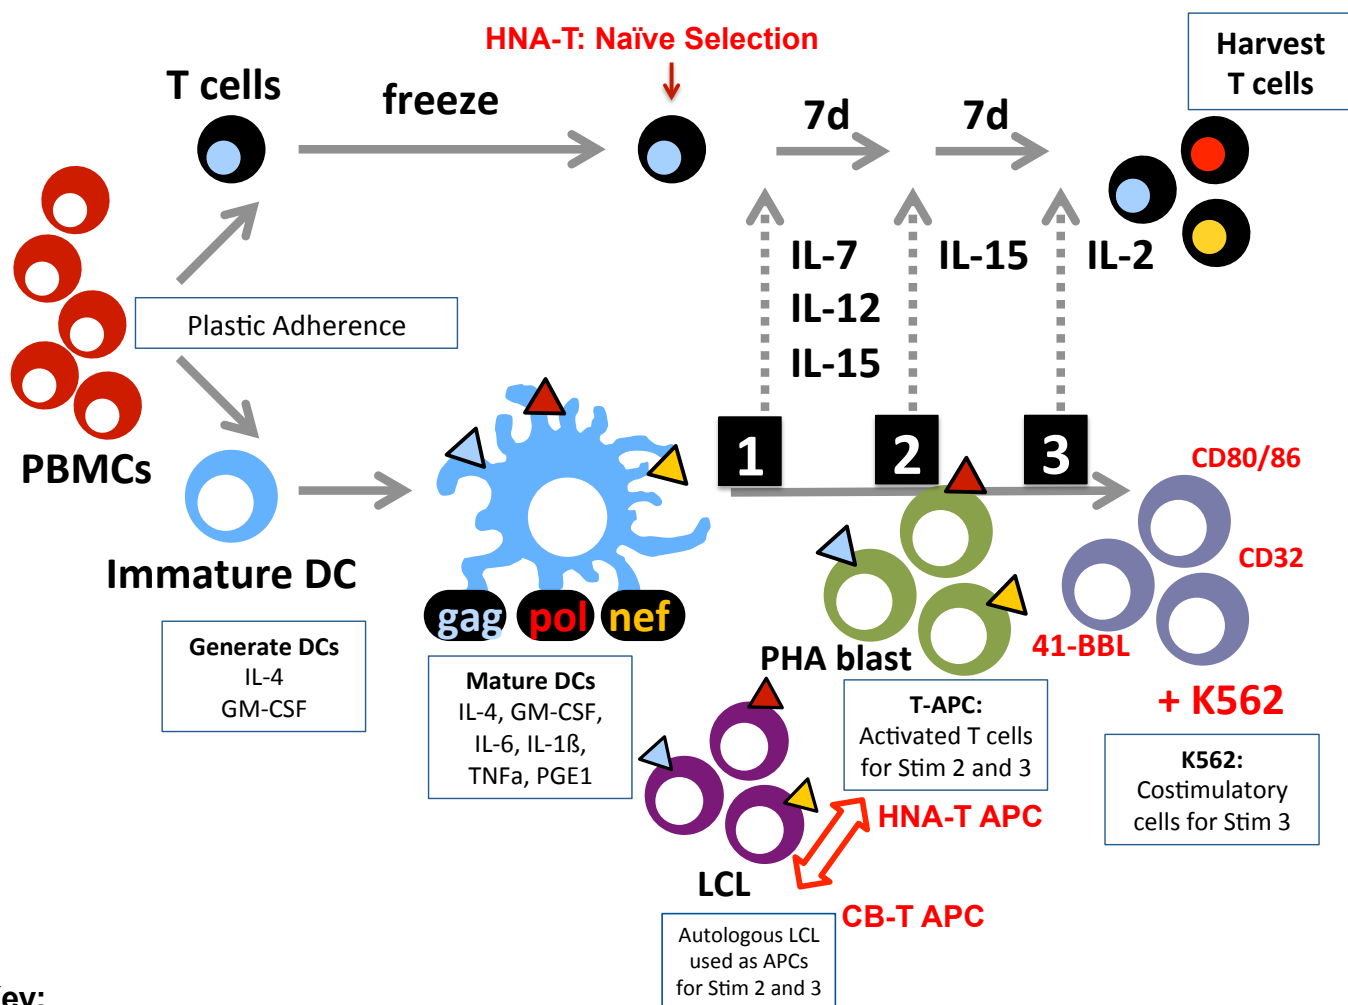

**Key:**

**HNA-T** (HIV-Negative Adult-derived HIV-Specific T cells)

**CB-T** (Cord Blood-derived HIV-Specific T cells)

**HPA-T** (HIV+ Adult-derived HIV-specific T cells)

## Supplemental Figure 2

### Naïve cells: CD3+CD45RA+CCR7+CD62L+

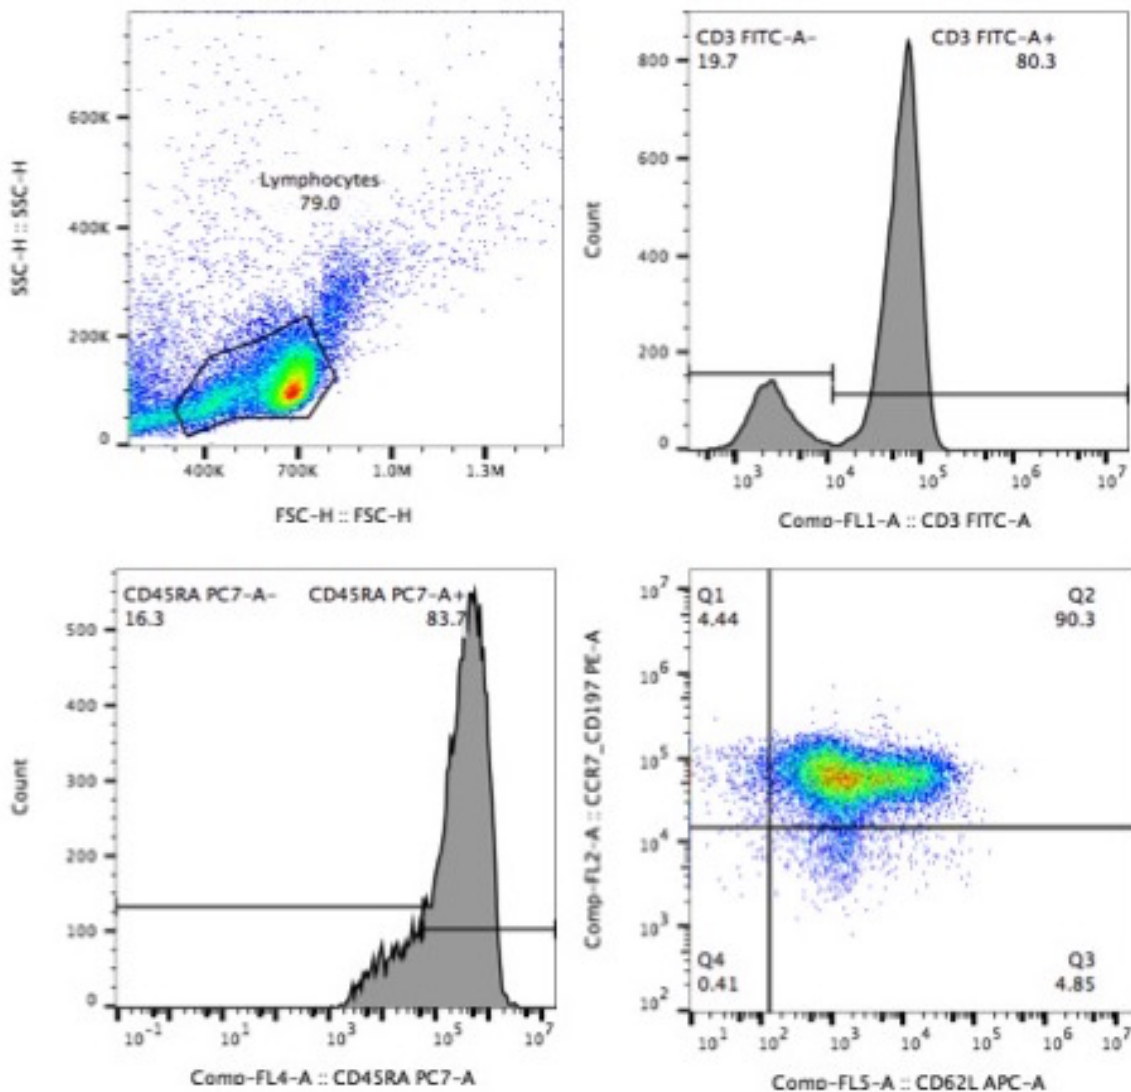

### Supplemental Figure 3

**A.**

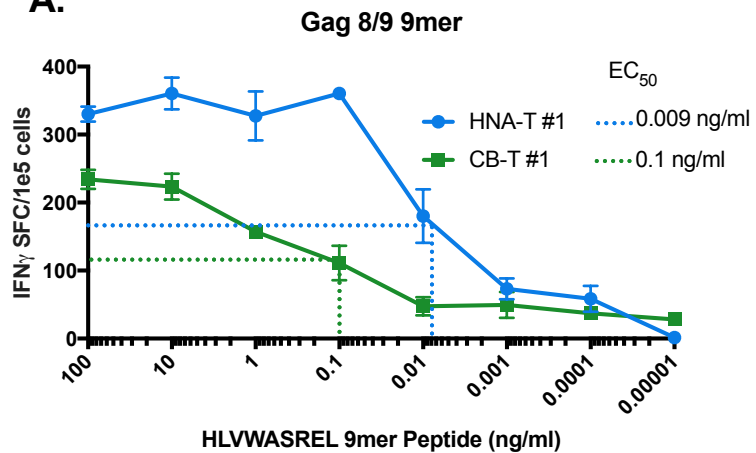

**B.**

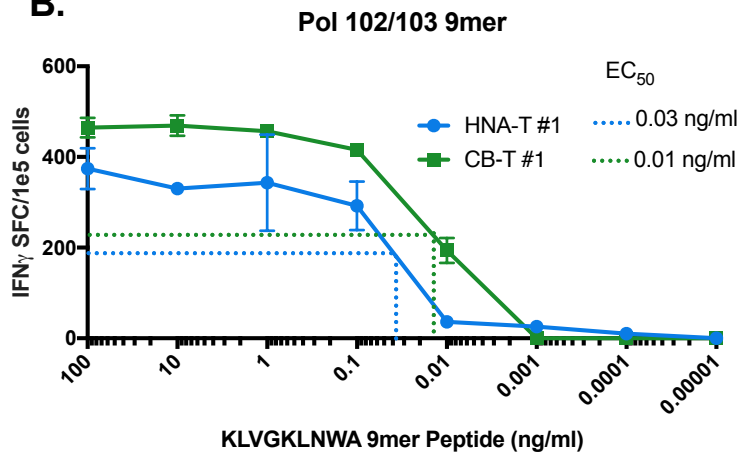

**Supplemental Figure 1. *Flowchart of HNA-T and CB-T GMP-Compliant Manufacturing Platform.*** HNA-T and CB-T products were manufactured over ~27 days per product, as described in the methods. The significant difference between the two manufacturing platforms is HNA-Ts are manufactured with autologous PHA blasts for APCs, whereas CB-Ts are generated with autologous LCLs for APCs.

**Supplemental Figure 2. *Magnetic Naïve T-cell Selection from HIV Seronegative Adults.*** HNA-Ts undergo magnetic selection (CD3+CD45RA+CCR7+CD62L+) prior to stimulation, to ensure products are generated from the naïve adult T-cell compartment. Naïve-selected cells are phenotyped by flow cytometry to ensure purity.

**Supplemental Figure 3. *HLA A02-restricted HIV-specific T-cells derived from virus-naïve donors do not recognize Gag SL9, but have high functional avidity.*** Functional avidity on ELISPOT revealed HNA-T and CB-T products have high functional avidity for their cognate epitope, compared to an HIV positive-derived product for SL9. **A.** Two products recognizing Gag 9mer HLVWASREL demonstrate high functional avidity (HNA-T  $EC_{50}$ =0.009 ng/ml and CB-T  $EC_{50}$ =0.1 ng/ml). **B.** Similarly, two products recognizing Pol 9mer KLVGKLNWA demonstrate high functional avidity (HNA-T  $EC_{50}$ =0.03 ng/ml and CB-T  $EC_{50}$ =0.01 ng/ml). In this figure, error bars represent the standard deviation.
